# Supplementary material for: Conversion of Lithium Chloride into Lithium Hydroxide by Solvent Extraction
Source: PubMed Central journal article supplement (PMC10015601; doi:10.1007/s40831-022-00629-2), 2022-12-05
Supplement: 40831_2022_629_MOESM1_ESM.pdf [file 40831_2022_629_MOESM1_ESM.pdf]

## **Conversion of Lithium Chloride into Lithium Hydroxide by Solvent Extraction**

Viet Tu Nguyen<sup>1</sup> • Clio Deferm<sup>1</sup> • Ward Caytan<sup>1</sup> • Sofía Riaño<sup>1</sup> • Peter Tom Jones<sup>2</sup> • Koen Binnemans<sup>1\*</sup>

✉ Koen Binnemans

[Koen.Binnemans@kuleuven.be](mailto:Koen.Binnemans@kuleuven.be)

<sup>1</sup> KU Leuven, Department of Chemistry, Celestijnenlaan 200F - box 2404, B-3001 Heverlee (Belgium)

<sup>2</sup> KU Leuven, Department of Materials Engineering, Kasteelpark Arenberg 44, P.O. box 2450, B-3001 Heverlee (Belgium)

**Table S1. Effect of the NaOH concentration on the first solvent extraction step (SX1)<sup>§</sup>**

| NaOH (M) | %E-SX1 |
|----------|--------|
| 0.50     | 46.2   |
| 0.75     | 55.6   |
| 1.00     | 61.9   |
| 1.25     | 68.0   |
| 1.50     | 69.8   |
| 1.75     | 73.0   |
| 2.00     | 75.0   |
| 2.25     | 77.6   |
| 2.50     | 78.4   |
| 5.00     | 92.1   |
| 10.0     | 96.0   |
| 12.5     | 89.3   |
| 15.0     | 37.7   |
| 17.5     | 17.7   |
| 20.0     | 8.94   |

<sup>§</sup>Organic phase: 0.65 M (or 30% wt.)[A336][Cl] and 2,6-di-*tert*-butylphenol (molar ratio = 1:1) in Shellsol D70; Aqueous phase: 0.5–20 M NaOH; O/A = 1; temperature = 20 °C; contact time = 30 min.

**Table S2. Effect of the LiCl concentration on the second solvent extraction step (SX2)<sup>§</sup>**

| LiCl (M) | %E-SX2 |
|----------|--------|
| 0.14     | 64.3   |
| 0.19     | 61.5   |
| 0.24     | 57.7   |
| 0.28     | 52.3   |
| 0.33     | 50.6   |
| 0.38     | 48.0   |
| 0.42     | 48.1   |
| 0.47     | 45.6   |
| 0.52     | 44.5   |
| 0.57     | 42.6   |
| 1.63     | 27.8   |
| 2.36     | 21.2   |

<sup>§</sup>Organic phase: 0.59 M [A336][OR] in Shellsol D70; Aqueous phase: 0.14–2.36 M LiCl; O/A = 1/1; temperature = 20 °C; contact time = 30 min.

**Table S3. Effect of the [A336][OR] concentration on the second solvent extraction step (SX2)<sup>§</sup>**

| [A336][OR] | %E-SX2 |
|------------|--------|
| 0.29       | 20.3   |
| 0.32       | 26.9   |
| 0.36       | 30.7   |
| 0.40       | 37.8   |
| 0.47       | 48.8   |
| 0.53       | 51.5   |
| 0.55       | 53.7   |
| 0.57       | 58.3   |
| 0.59       | 62.9   |

<sup>§</sup>Organic phase: 0.29–0.59 M [A336][OR] in Shellsol D70; Aqueous phase: 0.2 M LiCl; O/A = 1/1; temperature = 20 °C; contact time = 30 min.

**Table S4. Effect of the contact time on the first solvent extraction step (SX1)<sup>§</sup>**

| Time (min) | %E-SX1 |
|------------|--------|
| 1          | 61.3   |
| 2          | 72.4   |
| 4          | 85.1   |
| 6          | 86.7   |
| 8          | 87.0   |
| 10         | 86.7   |
| 12         | 86.7   |
| 14         | 87.0   |
| 16         | 87.0   |
| 18         | 87.0   |
| 20         | 87.3   |
| 30         | 87.6   |
| 40         | 87.9   |
| 50         | 87.9   |
| 60         | 88.5   |

<sup>§</sup>Organic phase: 0.65 M [A336][Cl] and 2,6-di-*tert*-butylphenol (molar ratio = 1:1) in Shellsol D70; Aqueous phase: 2.0 M NaOH; O/A = 1/2; temperature = 20 °C.

**Table S5. Effect of the contact time for the second solvent extraction step (SX2)<sup>§</sup>**

| Time (min) | %E-SX2 |
|------------|--------|
| 1.0        | 54.4   |
| 2.0        | 55.4   |
| 4.0        | 55.7   |
| 6.0        | 56.8   |
| 8.0        | 57.3   |
| 10         | 57.3   |
| 20         | 57.4   |
| 30         | 57.4   |
| 60         | 57.5   |

<sup>§</sup>Organic phase: 0.59 M [A336][OR] in Shellsol D70; Aqueous phase: 1.64 M LiCl; O/A = 3/1; temperature = 20 °C.

**Table S6. Effect of the O/A volume ratio on the first solvent extraction step (SX1)<sup>§</sup>**

| O/A volume ratio | %E-SX1     |            |
|------------------|------------|------------|
|                  | 1.0 M NaOH | 2.0 M NaOH |
| 1/5              | 79.8       | 89.9       |
| 1/4              | 78.5       | 88.2       |
| 1/3              | 75.6       | 85.1       |
| 1/2              | 70.8       | 82.3       |
| 1/1              | 59.2       | 73.4       |
| 2/1              | 44.7       | 62.4       |
| 3/1              | 37.3       | 55.0       |
| 4/1              | 31.6       | 49.7       |
| 5/1              | 28.2       | 45.3       |

<sup>§</sup>Organic phase: 0.65 M [A336][Cl] and 2,6-di-*tert*-butylphenol (molar ratio = 1:1) in Shellsol D70; Aqueous phase: 1.0 or 2.0 M NaOH; O/A = 1/5 to 5/1; temperature = 20 °C; contact time = 30 min.

**Table S7. Effect of the O/A volume ratio on the second solvent extraction step (SX2)<sup>§</sup>**

| O/A volume ratio | %E-SX2            |                   |                   |
|------------------|-------------------|-------------------|-------------------|
|                  | 1.64 M LiCl       | 2.36 M LiCl       | 2.36 M LiCl       |
| 1/5              | 6.91 <sup>a</sup> | 4.88 <sup>a</sup> | 7.04 <sup>b</sup> |
| 1/4              | 8.44 <sup>a</sup> | 5.81 <sup>a</sup> | 8.78 <sup>b</sup> |
| 1/3              | 11.0 <sup>a</sup> | 7.70 <sup>a</sup> | 11.0 <sup>b</sup> |
| 1/2              | 15.8 <sup>a</sup> | 11.3 <sup>a</sup> | 15.2 <sup>b</sup> |
| 1/1              | 27.8 <sup>a</sup> | 21.2 <sup>a</sup> | 26.2 <sup>b</sup> |
| 2/1              | 45.4 <sup>a</sup> | 36.3 <sup>a</sup> | 40.9 <sup>b</sup> |
| 3/1              | 57.4 <sup>a</sup> | 47.0 <sup>a</sup> | 50.4 <sup>b</sup> |
| 4/1              | 66.7 <sup>a</sup> | 55.6 <sup>a</sup> | 57.3 <sup>b</sup> |
| 5/1              | 73.2 <sup>a</sup> | 62.3 <sup>a</sup> | 64.0 <sup>b</sup> |

<sup>§</sup>Organic phase: <sup>a</sup>0.59 M and <sup>b</sup>1.00 M [A336][OR] in Shellsol D70; Aqueous phase: 1.64 and 2.36 M LiCl; O/A = 1/5 to 5/1; temperature = 20 °C; contact time = 30 min.

**Table S8. Simulation of 6-stage counter-current for the second solvent extraction step (SX2)<sup>§</sup>**

| Stage | %E-SX2      |             |
|-------|-------------|-------------|
|       | 1.64 M LiCl | 2.36 M LiCl |
| 1     | 13.4        | 3.23        |
| 2     | 28.0        | 4.37        |
| 3     | 44.2        | 19.3        |
| 4     | 61.8        | 34.5        |
| 5     | 81.4        | 55.8        |
| 6     | 99.5        | 82.0        |

<sup>§</sup>Organic phase: 0.59 M [A336][OR] in Shellsol D70; Aqueous phase: 1.64 and 2.36 M LiCl; O/A = 3/1; temperature = 20 °C; contact time = 4 min.

**Table S9. Effect of the equilibration time in the individual operation of the first solvent extraction step (SX1) in 2-stage counter-current mixer-settlers<sup>§</sup>**

| Time (h) | %E-SX1  |         |
|----------|---------|---------|
|          | Stage 1 | Stage 2 |
| 0.3      | 28.5    | 38.4    |
| 0.5      | 28.8    | 58.3    |
| 0.7      | 22.6    | 63.6    |
| 0.8      | 23.6    | 63.3    |
| 1.0      | 26.4    | 66.7    |
| 2.0      | 25.4    | 68.2    |
| 3.0      | 26.0    | 68.2    |
| 4.0      | 27.9    | 66.4    |
| 8.0      | 29.5    | 65.7    |
| 9.0      | 27.3    | 65.1    |
| 10.0     | 26.7    | 77.5    |
| 10.5     | 29.1    | 90.8    |
| 11.0     | 20.5    | 91.5    |
| 12.0     | 20.5    | 91.2    |
| 12.5     | 22.9    | 90.8    |
| 13.0     | 22.9    | 90.5    |

<sup>§</sup>Organic phase: 0.65 M [A336][Cl] and 2,6-di-*tert*-butylphenol (molar ratio = 1:1) in Shellsol D70; Aqueous phase: 2.0 M NaOH; O/A = 1/2; temperature = 20 °C; retention time = 2–4 min; 1000 rpm.

**Table S10. Effect of the equilibration time in the individual operation of the second solvent extraction step (SX2) in 6-stage counter-current mixer-settlers<sup>§</sup>**

| Time (h) | %E-SX2  |         |         |         |         |         |
|----------|---------|---------|---------|---------|---------|---------|
|          | Stage 1 | Stage 2 | Stage 3 | Stage 4 | Stage 5 | Stage 6 |
| 0.5      | 8.3     | 15.3    | 21.0    | 24.2    | 26.4    | 45.1    |
| 1.0      | 7.2     | 14.6    | 20.4    | 24.5    | 34.8    | 56.8    |
| 2.0      | 6.6     | 13.6    | 21.8    | 31.3    | 48.8    | 70.8    |
| 3.0      | 7.0     | 15.0    | 25.0    | 37.9    | 56.5    | 76.3    |
| 4.0      | 7.6     | 16.6    | 27.8    | 41.0    | 59.3    | 81.1    |
| 5.0      | 9.3     | 19.5    | 31.4    | 45.4    | 63.1    | 82.8    |
| 6.0      | 9.8     | 22.0    | 34.4    | 48.8    | 66.2    | 84.8    |
| 7.0      | 10.9    | 22.8    | 35.4    | 49.7    | 68.0    | 85.7    |
| 8.0      | 12.1    | 24.3    | 37.7    | 52.6    | 69.2    | 86.3    |
| 9.0      | 13.0    | 25.1    | 37.6    | 52.2    | 67.3    | 83.8    |
| 10       | 12.8    | 26.5    | 39.0    | 51.7    | 67.0    | 84.4    |
| 11       | 12.8    | 25.4    | 40.0    | 55.3    | 67.0    | 83.1    |
| 12       | 11.2    | 23.7    | 38.4    | 53.6    | 66.7    | 81.8    |

<sup>§</sup>Organic phase: 0.58 M [A336][OR] in Shellsol D70; Aqueous phase: 1.64 M LiCl; O/A = 3/1; 20 °C; retention time = 4–9 min; 1000 rpm

**Table S11. Contact time for the simultaneous operation of the first and second solvent extraction step (SX1) and (SX2) in mixer-settlers<sup>§</sup>**

| Time (h) | %E-SX1 | %E-SX2 |
|----------|--------|--------|
| 1.0      | 87.3   | 26.1   |
| 2.0      | 87.9   | 59.7   |
| 3.0      | 87.3   | 75.6   |
| 4.0      | 89.0   | 84.4   |
| 5.0      | 87.6   | 89.1   |
| 6.0      | 86.8   | 93.3   |
| 7.0      | 86.5   | 95.7   |
| 8.0      | 86.8   | 95.9   |
| 9.0      | 87.1   | 98.5   |

<sup>§</sup>(SX1) Organic phase: 0.65 M [A336][Cl] and 2,6-di-*tert*-butylphenol (molar ratio = 1:1) in Shellsol D70; Aqueous phase: 2.0 M NaOH; O/A = 1/2; 20 °C; retention time in each mixer = 2 min; 1500 rpm; (SX2) Organic phase: 0.58 M [A336][OR] in Shellsol D70; Aqueous phase: 1.64 M LiCl; O/A = 3/1; temperature = 20 °C; retention time in each mixer = 4 min; 1500 rpm

**Table S12. Crystallization of lithium hydroxide monohydrate from the final product solution<sup>§</sup>**

| Method             | Evaporation | Antisolvent precipitation |             |
|--------------------|-------------|---------------------------|-------------|
|                    | Water       | Ethanol                   | Isopropanol |
| Recovery yield (%) | 87.3        | 3.87                      | 94.6        |
| Purity (%)         | 99.8        | 100                       | 99.8        |

<sup>§</sup>Final product solution: 1.55 M LiOH and 0.025 M LiCl.



**Table S13. Effect of volume ratio  $V_{\text{alcohol}}/V_{\text{aq}}$  on the mass recovery of lithium hydroxide (as the monohydrate)**

| $V_{\text{alcohol}}/V_{\text{aq}}$ | Mass recovery (%) |             |
|------------------------------------|-------------------|-------------|
|                                    | Ethanol           | Isopropanol |
| 0.5                                | 6.32              | 5.94        |
| 1.0                                | 6.06              | 6.06        |
| 1.5                                | 5.81              | 6.39        |
| 2.0                                | 5.29              | 9.30        |
| 3.0                                | 4.19              | 50.6        |
| 4.0                                | 4.13              | 77.5        |
| 5.0                                | 4.45              | 86.7        |
| 6.0                                | 3.16              | 92.4        |
| 7.0                                | 3.87              | 94.6        |
